# Supplementary material for: Changes in Lake Inundation and Shrinkage Within the Framework of Coevolutionary River-Lake state
Source: Research Square preprint supplement (doi:10.21203/rs.3.rs-3254913/v1), 2023-09-08
Supplement: Supplementary file 1 [file 4c681f6163fefc1abee06c02.docx]

**Lake Wetland Water Characteristics under the Transformation of River-lake Relationships: Dongting Lake Basin**

Hongxiang WANG, Xiangyu BAI，Weiqi YUAN, Siyuan CHENG, Lintong Huang

Huan YANG, Yanchu MA, Wenxian GUO*

Highlights:

- Coevolution of river-lake states under extreme hydrological conditions.
- Cross wavelet and multifractal analysis of rivers-lake states change characteristics.
- Changes in response between different rivers and lake.
- The regional distribution of lake water shrinkage was revealed.
